# Supplementary material for: Transgenic Microalgae Expressing Double-Stranded RNA as Potential Feed Supplements for Controlling White Spot Syndrome in Shrimp Aquaculture
Source: MDPI journal article supplement (doi:10.3390/microorganisms11081893), 2023-07-26
Supplement: s1 [file s1]

## **Supplementary Data**

### **Transgenic microalgae expressing double-stranded RNA as potential feed supplements for controlling white spot syndrome in shrimp aquaculture**

Patai Charoonnart<sup>1,2\*</sup>, Henry Nicolas Taunt<sup>3</sup>, Luyao Yang<sup>3</sup>, Conner Webb<sup>4</sup>, Colin Robinson<sup>4</sup>,  
Vanvimon Saksmerprom<sup>1,2</sup> & Saul Purton<sup>3</sup>

<sup>1</sup>Center of Excellence for Shrimp Molecular Biology and Biotechnology (Centex Shrimp), Faculty of Science, Mahidol University, Bangkok 10400, Thailand

<sup>2</sup>National Center for Genetic Engineering and Biotechnology (BIOTEC), National Science and Technology Development Agency, Pathum Thani 12120, Thailand

<sup>3</sup>Department of Structural and Molecular Biology, University College London, London WC1E 6BT, UK

<sup>4</sup>Centre for Molecular Processing, School of Biosciences, University of Kent, Canterbury CT2 7NJ, UK

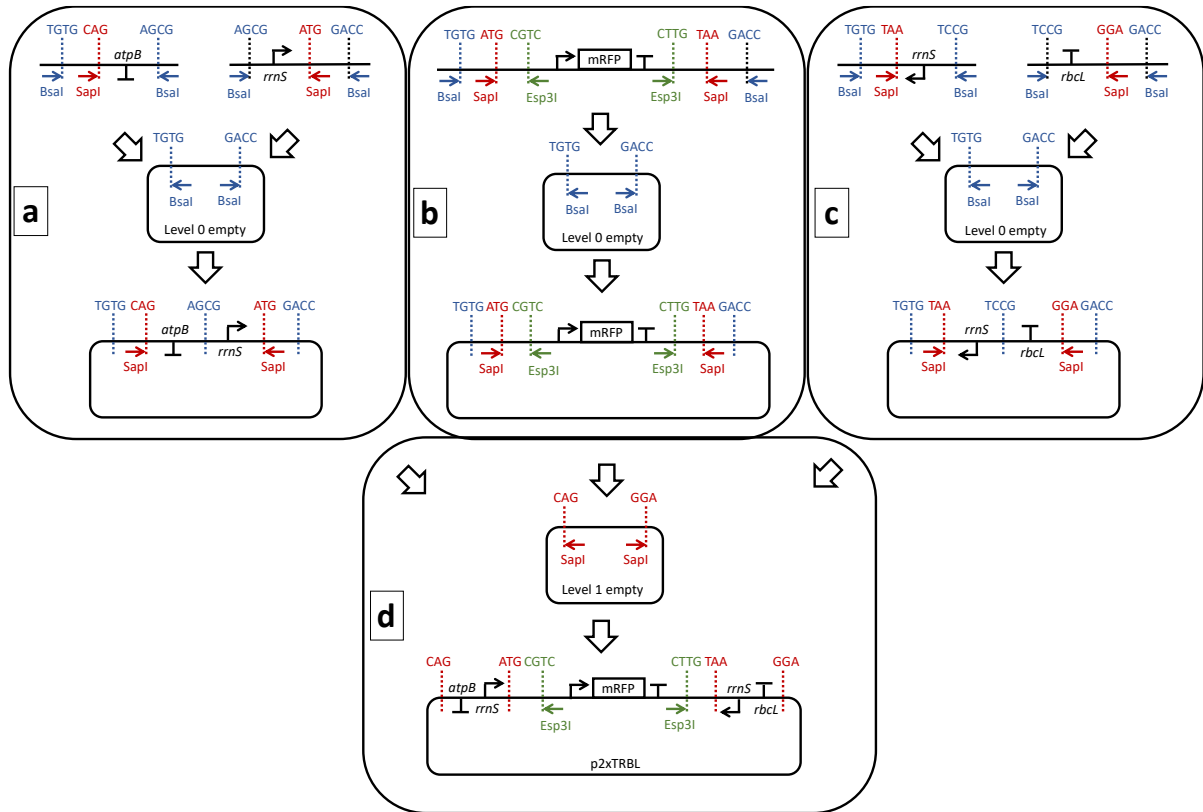

**Figure S1** Golden Gate assembly of p2xTRBL. *C. reinhardtii* expression elements were amplified by PCR, with the addition of 5' extensions to allow *BsaI* cloning into the Level 0 empty vector (a, c). The mRFP cassette was synthesized *de novo*, also with the addition of Golden Gate cloning sequences (b). The three Level 0 cassettes were cloned into a Level 1 empty vector using *SapI* to generate p2xTRBL (d).

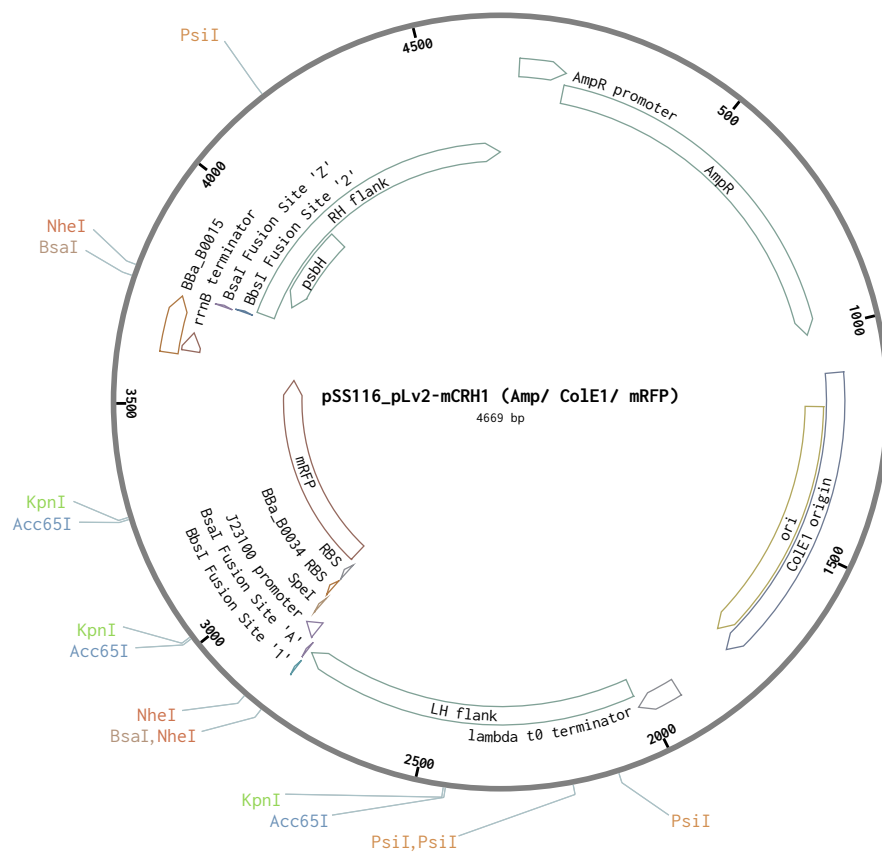

**Figure S2** Map of plasmid pSS116, an integration vector for targeting transgenes into the *C. reinhardtii* chloroplast genome between *psbH* and *trnE2*.

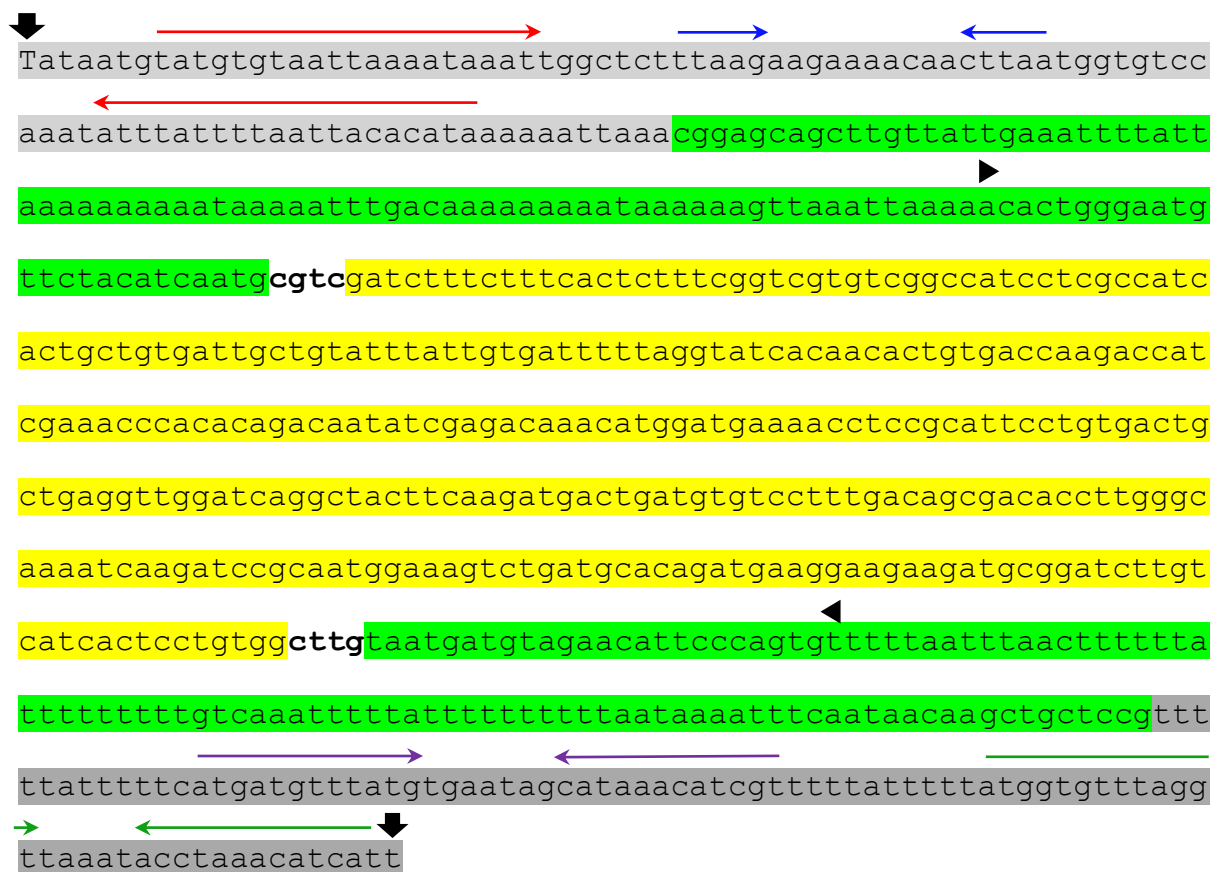

**Figure S3** Sequence of the *VP28* transcription cassette. The *VP28* sequence is highlighted in **yellow**. *Esp31* fusion sites are in **bold**. The *rrnS* promoter elements are highlighted in **green** with the transcriptional start site indicated by a black triangle. The *atpB* terminator is highlighted in **light grey** and the *rbcL* terminator in **dark grey**. Inverted repeat regions are indicated by horizontal coloured arrows and the transcript termination sites by vertical black arrows.

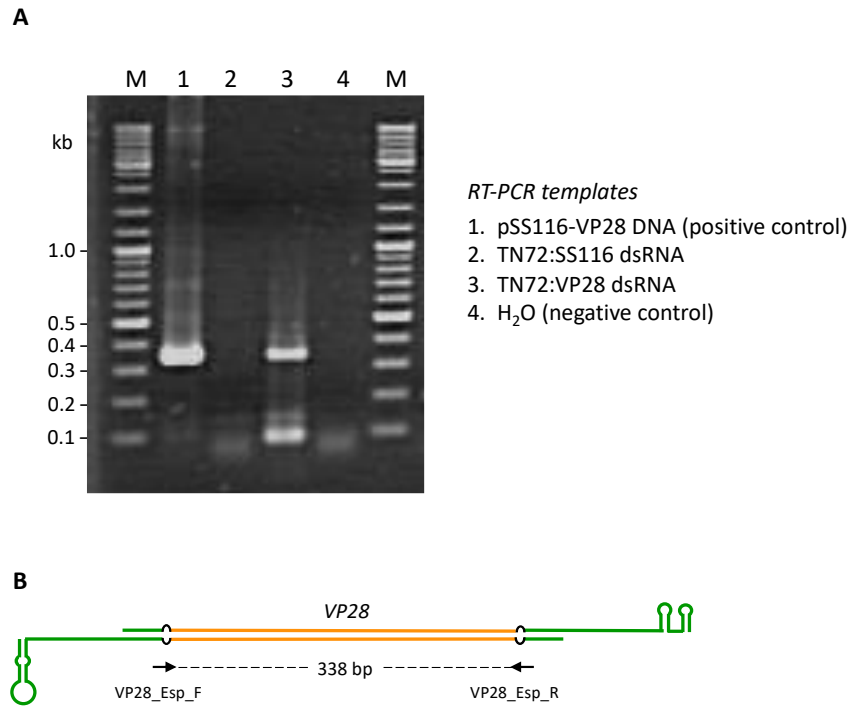

**Figure S4** RT-PCR analysis of dsRNA from transformant TN72:VP28. **A.** Lane 1: PCR amplification of VP28 DNA from pSS116-VP28 plasmid. Lane 2: RT-PCR using dsRNA fraction from strain TN72:SS116. Lane 3: RT-PCR using dsRNA fraction from strain TN72:VP28. 4 RT-PCR using ddH<sub>2</sub>O as template. **B.** Illustration of primers used for RT-PCR.

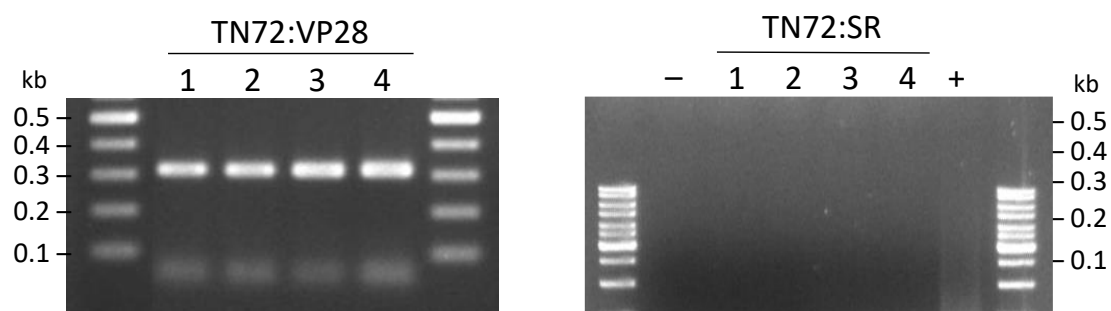

**Figure S5** Detection of dsRNA from freeze-dried *C. reinhardtii*. Four replicate samples each representing 0.1 g of biomass from either TN72:VP28 (left panel) or TN72:SR (right panel) were used for dsRNA extraction and RT-PCR using specific primers VP28\_Esp\_F and VP28\_Esp\_R (See Figure S4). Controls are H<sub>2</sub>O (–) or purified dsRNA (+) as template.

**Table S1** Details of primers used

| Primer     | Sequence (5'–3')                                | Function                                                                                                                                                                          | Reference |
|------------|-------------------------------------------------|-----------------------------------------------------------------------------------------------------------------------------------------------------------------------------------|-----------|
| VP28_Esp_F | ATACG <u>CGTCTCT</u> CGTCGATCTTTCTTTCACTCTTTTCG | Generation of VP28 fragment for p2XTRBL cloning ( <i>Esp</i> 31 sites underlined). RT-PCR analysis of dsRNA from <i>E. coli</i> and <i>C. reinhardtii</i> (PCR product of 338 bp) | This work |
| VP28_Esp_R | ATACG <u>CGTCTCT</u> CAAGCCACAGGAGTGATGACAA     |                                                                                                                                                                                   |           |
| rbcL_F     | GTCACCACCAGACATACGAAG                           | Internal control for chloroplast DNA extraction. (PCR product of 264 bp)                                                                                                          | [18]      |
| rbcL_R     | GGTCACTACTTAAACGCTAC                            |                                                                                                                                                                                   |           |
| TN72_F     | GTCATTGCGAAAATACTGGTGC                          | TN72 plastome-specific primers for assessing homoplasmic status. (PCR product of 0.88 kb)                                                                                         | [19]      |
| TN72_R     | CGGATGTAACTCAATCGGTAG                           |                                                                                                                                                                                   |           |
| WSSV447_F  | ATGAGAATGAACTCCAACCTTAA                         | WSSV load assay.                                                                                                                                                                  | [26]      |
| WSSV447_R  | CAGAGCCTAGTCTATCAATCAT                          |                                                                                                                                                                                   |           |
